# Supplementary material for: Utilizing redox-sensitive GFP fusions to detect in vivo redox changes in a genetically engineered prokaryote
Source: PubMed Central journal article supplement (PMC6831853; doi:10.1016/j.redox.2019.101280), 2019-07-20
Supplement: mmc1.pdf [file mmc1.pdf]

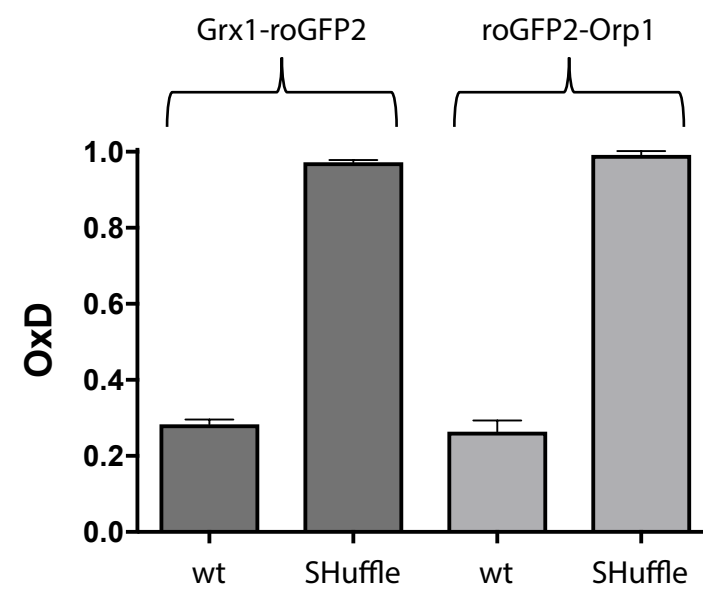

**Supplementary Figure 1.**roGFP2 probes are fully oxidized when expressed in SHuffle cells.
